# Supplementary material for: Effects of bumetanide on neurobehavioral function in children and adolescents with autism spectrum disorders
Source: PubMed Central journal article supplement (PMC5416661; doi:10.1038/tp.2017.10), 2017-03-14
Supplement: tp201710x2.pdf [file tp201710x2.pdf]

**A**

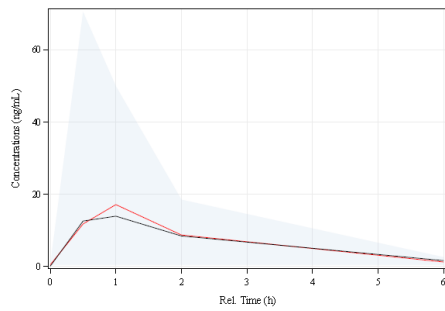

**B**

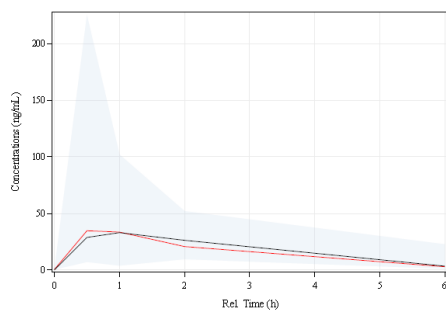

**C**

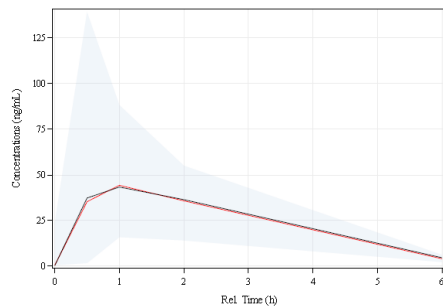

**Supplemental Figure 1: Population pharmacokinetic model and median observed profiles for 0.5, 1.0 and 2.0 mg BID treated groups. A. Dose level 0.5 mg BID, Day 90. B. Dose level 1.0 mg BID, Day 90. C. Dose level 2.0 mg BID, Day 90. Blue area: 90% observation quantile band, Red line: Median observed profile, Black line: Median population model prediction.**
