# Supplementary material for: Effects of bumetanide on neurobehavioral function in children and adolescents with autism spectrum disorders
Source: PubMed Central journal article supplement (PMC5416661; doi:10.1038/tp.2017.10), 2017-03-14
Supplement: tp201710x4.pdf [file tp201710x4.pdf]

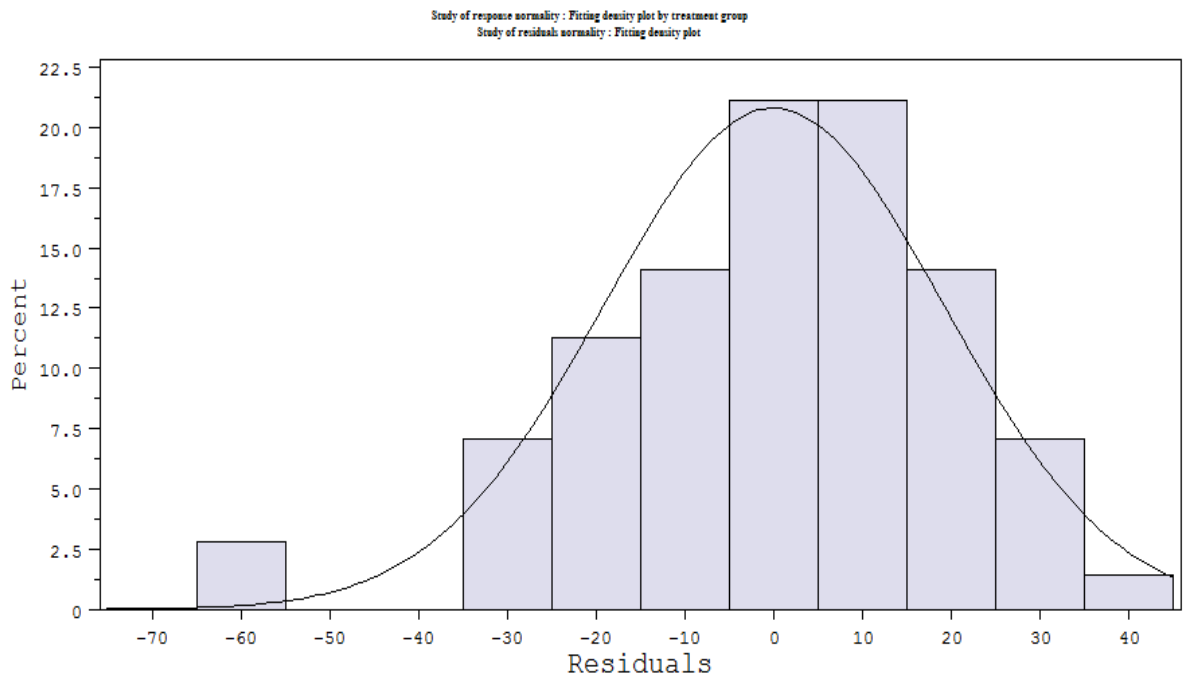

Neuroclin02

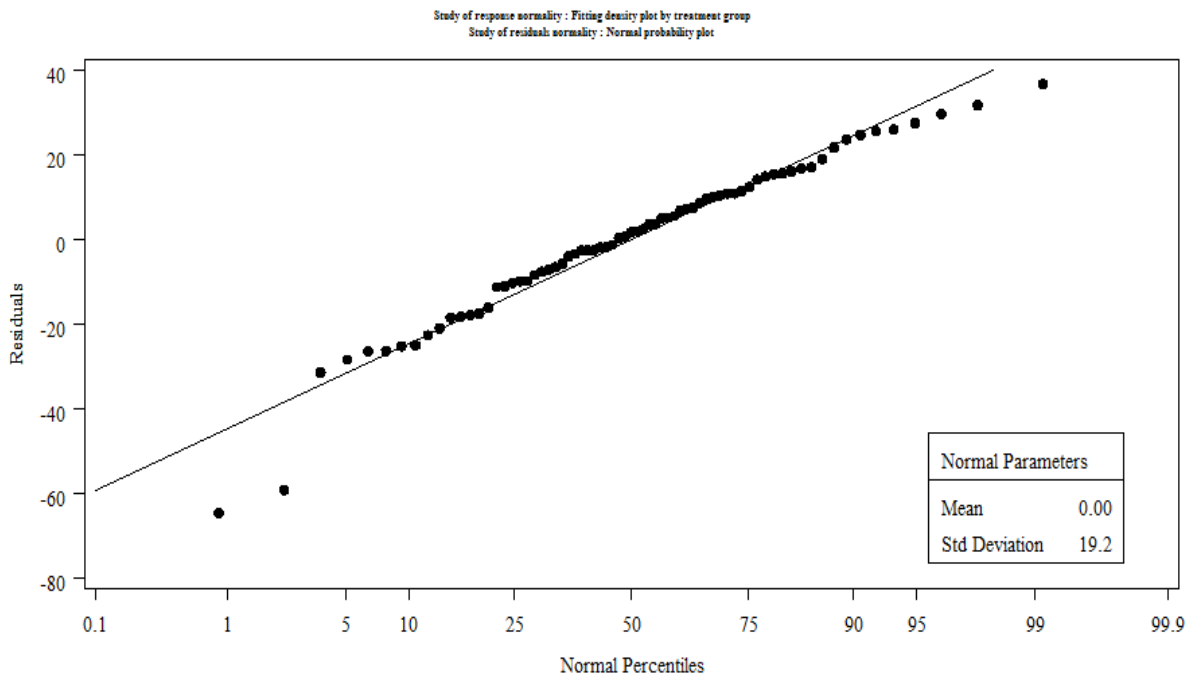

Neuroclin02
